# Supplementary material
Source: PubMed Central journal article supplement (PMC3932186)
Supplement: NIHMS550055-supplement-1.pdf [file NIHMS550055-supplement-1.pdf]

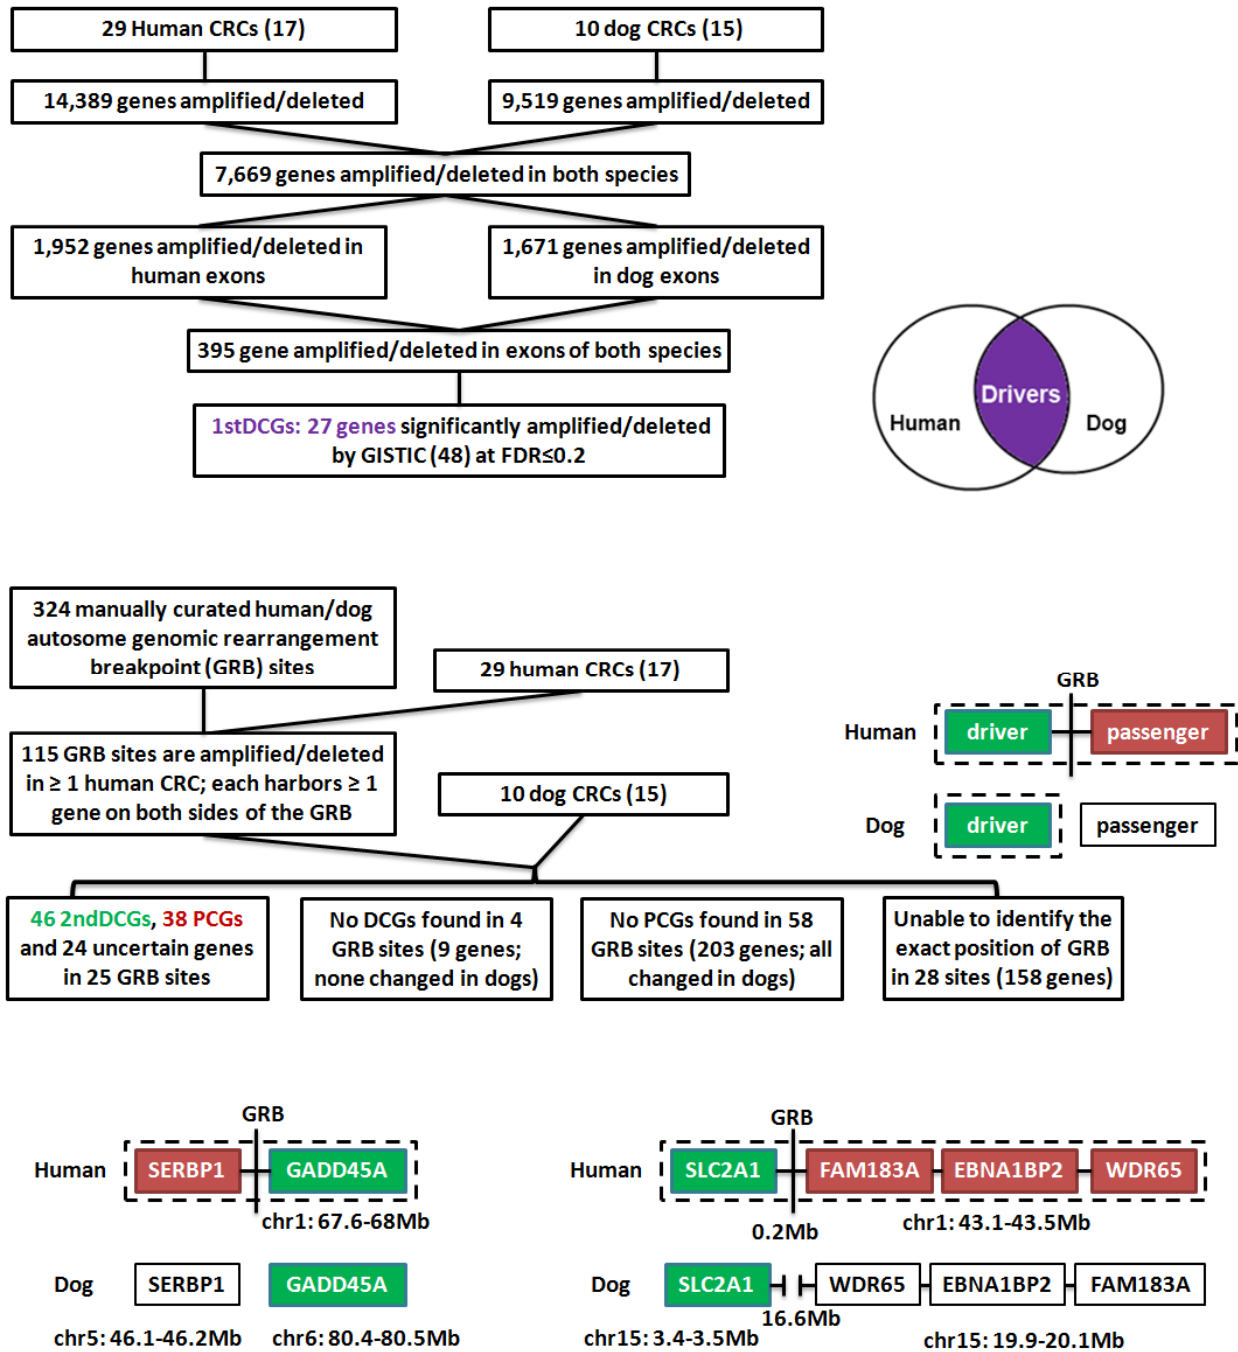

**Fig. s1.** CRC DCG-PCG distinction via human-dog comparison.

| p values of expression change |                   |          |                    |          |
|-------------------------------|-------------------|----------|--------------------|----------|
|                               | 0hr vs 24hr Taxol |          | 24hr vs 48hr Taxol |          |
|                               | Amplification     | Deletion | Amplification      | Deletion |
| 1stDCGs                       | 0.120             | 0.019 ↓  | 0.424              | 0.052 ↑  |
| 2ndDCGs                       | 0.191             | 0.026 ↓  | 0.326              | 0.122    |
| PCGs                          | 0.243             | 0.396    | 0.535              | 0.545    |

**Fig. s2.** mRNA expression changes of DCGs and PCGs, separating based on their amplification or deletion status in human CRCs (Supplementary Table s1), in responding to Taxol-treatment.

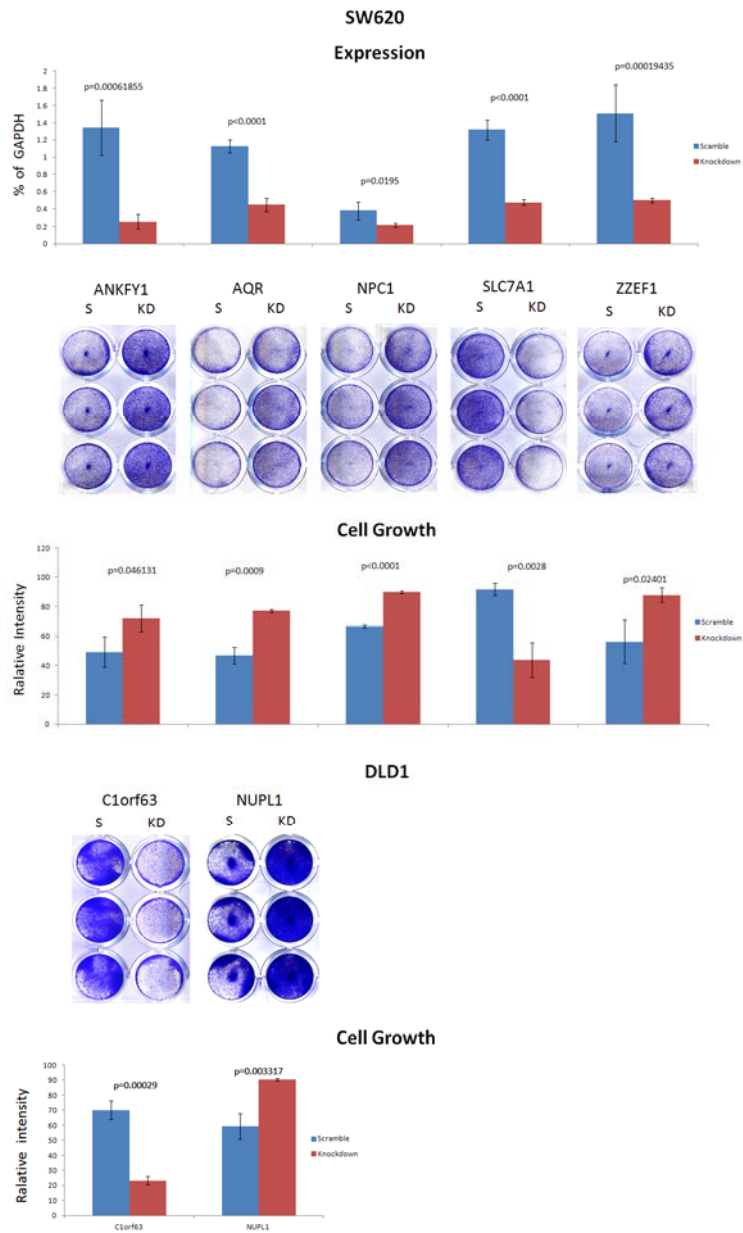

**Fig. s3a.** siRNA knockdown of the DCGs shown promotes or inhibits the growth of SW620 cells (top) and DLD1 cells (bottom).

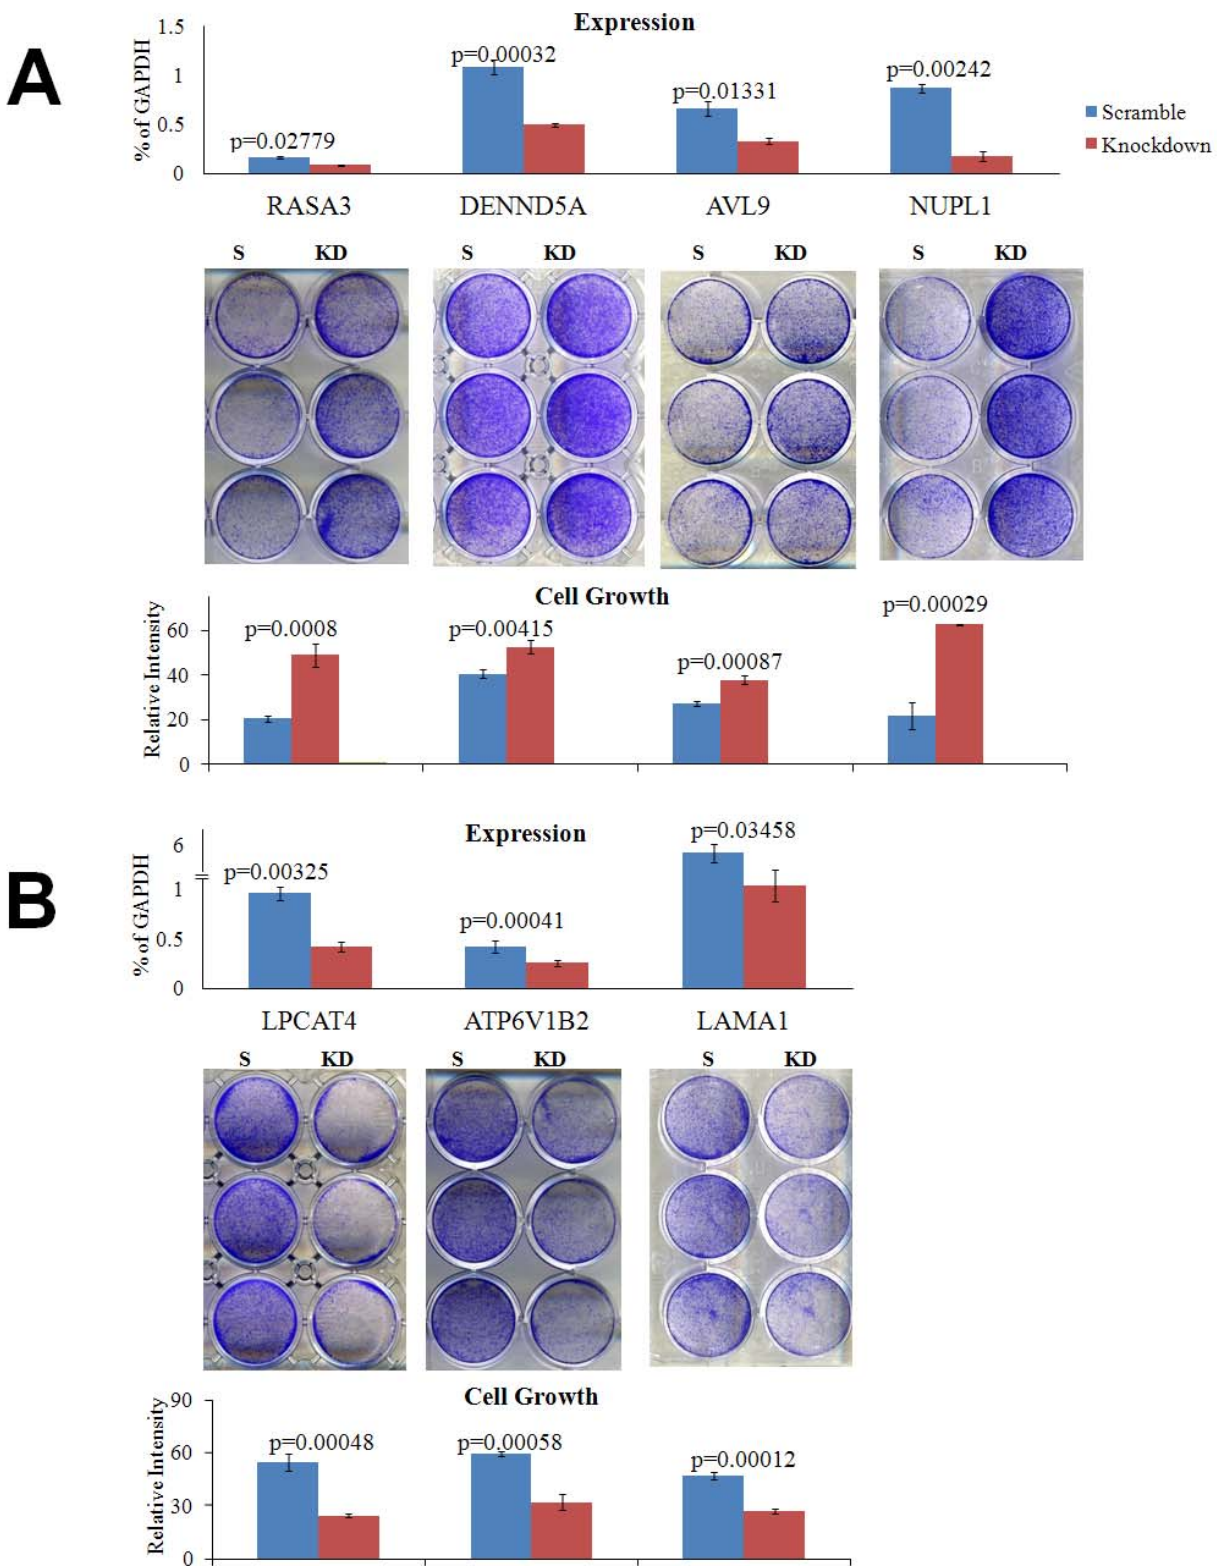

**Fig. s3b.** siRNA knockdown of the DCGs shown promotes or inhibits the growth of HeLa Cells.

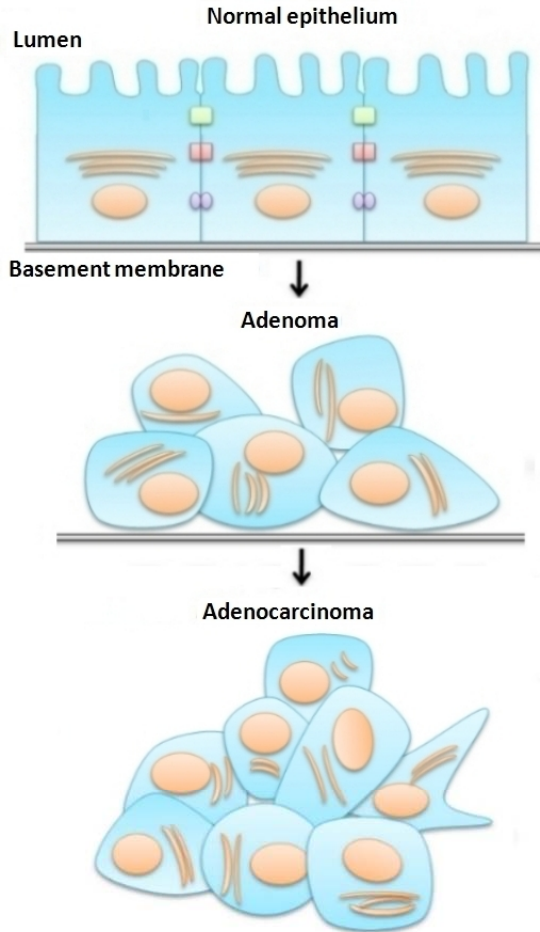

### Known polarity genes

*APC, MPP7, ARHGEF7, LAMA1, PCDH9, FREM2, KIFAP3, DLGAP2, RAP1A, SLC12A6, SLC2A1, ACTC1, ATP6V1B2, ENPP1*

### MET/EMT genes

*EFNB2, EYA2*

### Genes located in polarized membrane

Apical: *ATP6V1B2, MUC16*

Tight junction: *APC, MPP7*

Adherent junction: *ARHGEF7*

Basolateral: *ENPP1, SLC12A6, SLC2A1*

Basement: *FREM2, LAMA1*

### Adhesion/motility

| Cell-cell adhesion | Cell-substratum adhesion | Signaling for adhesion | Cytoskeleton   |
|--------------------|--------------------------|------------------------|----------------|
| <i>PCDH9</i>       | <i>LAMA1</i>             | <i>APC</i>             | <i>PHACTR3</i> |
| <i>CSMD3</i>       | <i>FREM2</i>             | <i>MPP7</i>            | <i>MYCBP2</i>  |
| <i>EFHA2?</i>      | <i>FNDC3A</i>            | <i>ARHGEF7</i>         | <i>KIFAP3</i>  |
| <i>C9orf93?</i>    | <i>PTPRD?</i>            | <i>DLGAP2</i>          | <i>SYNPO2L</i> |
| <i>CSMD2</i>       | <i>EPDR1</i>             | <i>RAP1A</i>           | <i>MYOZ1</i>   |
| <i>GJD2</i>        | <i>TMPRSS11B</i>         | <i>SFRP4</i>           | <i>ACTC1</i>   |
| <i>MUC16</i>       | <i>TMPRSS11F</i>         | <i>ARHGAP11A</i>       | <i>GADD45A</i> |
|                    | <i>AKR1B1?</i>           |                        | <i>DDX20</i>   |
|                    | <i>AKR1B10?</i>          |                        | <i>ZZEF1?</i>  |
|                    | <i>AKR1B15?</i>          |                        | <i>ACTL9?</i>  |
|                    | <i>TXNDC3?</i>           |                        |                |
|                    | <i>CTGF</i>              |                        |                |
|                    | <i>CHIA</i>              |                        |                |
|                    | <i>PRSS33?</i>           |                        |                |

### Polarized trafficking/transport

| Transport       | Trafficking    | Signaling for trafficking |
|-----------------|----------------|---------------------------|
| <i>SLC7A1</i>   | <i>NPC1</i>    | <i>DENND5A</i>            |
| <i>NUPL1</i>    | <i>TM9SF4?</i> | <i>ENPP1</i>              |
| <i>XKR9?</i>    | <i>AVL9</i>    | <i>ADORA3</i>             |
| <i>SLC2A1</i>   | <i>MLANA</i>   | <i>AGAP5</i>              |
| <i>SLC12A6</i>  | <i>ANKFY1?</i> | <i>RASA3</i>              |
| <i>SLC18A1</i>  | <i>SGMS1?</i>  | <i>SCG5</i>               |
| <i>KCND3</i>    | <i>GOLGA8A</i> |                           |
| <i>KCTD5</i>    | <i>GOLGA8B</i> |                           |
| <i>ATP6V1B2</i> | <i>SEC24C</i>  |                           |
| <i>CHRNA7</i>   |                |                           |
| <i>ATP2A3?</i>  |                |                           |

### Other functions

| Transcription regulation                                                                            | Protein ubiquitination & degradation                                                   | Glucose/lipid/RNA/other metabolisms                                                                                                    | Signaling                                                                        | Unknown                                                                                         |
|-----------------------------------------------------------------------------------------------------|----------------------------------------------------------------------------------------|----------------------------------------------------------------------------------------------------------------------------------------|----------------------------------------------------------------------------------|-------------------------------------------------------------------------------------------------|
| <i>DIDO1, EYA2, ZBTB20, DDX20, EZH2, ZNF558, PHC2, RBAK, TCEB2, ZNF362, ZNF786, ZNF828, ZSCAN20</i> | <i>MAN1B1, MYCBP2, CUL1, CUL3, PDIA4, TXNDC3, UBE2G1, ZZEF1, DNAJA2, ERMP1, PRSS33</i> | <i>ZBTB20?, SLC2A1, ENPP1, GPT2, AKR1B1, AKR1B10, AKR1B15, BPGM, LPCAT4, SGMS1, ASAH2B, AQR, INTS10, SERBP1, SRRM2, YTHDC1, TARSL2</i> | <i>PHACTR3, PTPRD, ADORA3, GADD45A, MMD2, GPR141, OR2Z1, OR4F15, OR4F6, SCG5</i> | <i>C1orf63, C1orf162, FAM7A2, BMS1P4, FAM124B, FAM183A, KIAA1432, LOC441208, TRIM62?, WDR65</i> |

**Fig. s4.** DCGs (but not PCGs) are enriched in functions associated with epithelial cell polarity establishment and maintenance, and many DCGs participate in cell proliferation/death and/or cell cycle control. All genes are shown here.
